# Supplementary material for: In situ generation of sodium alginate/hydroxyapatite/halloysite nanotubes nanocomposite hydrogel beads as drug-controlled release matrices
Source: Royal Society of Chemistry journal article supplement (doi:10.1039/c3tb20971g), 2013-01-01
Supplement: c3tb20971g.pdf [file c3tb20971g.pdf]

Supporting Information

***In situ* generation of sodium alginate/hydroxyapatite/halloysite nanotubes nanocomposite hydrogel beads as drug-controlled release matrices**

Ling Fan,<sup>a</sup> Junping Zhang,<sup>a,\*</sup> and Aiqin Wang<sup>a</sup>

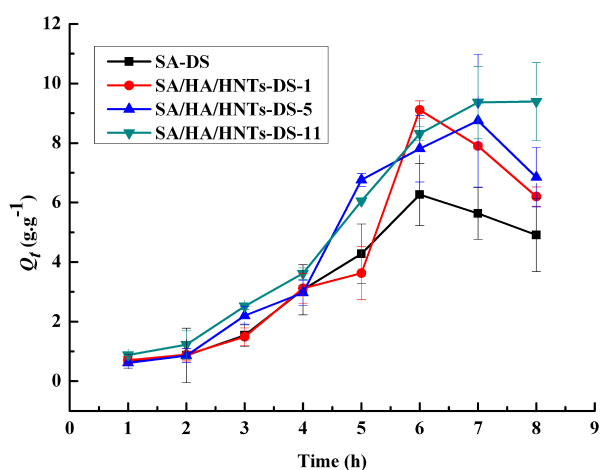

**Fig. S1** Variation of swelling ratio of SA-DS and SA/HA/HNTs-DS nanocomposite beads with swelling time in pH 5.0 PBS.

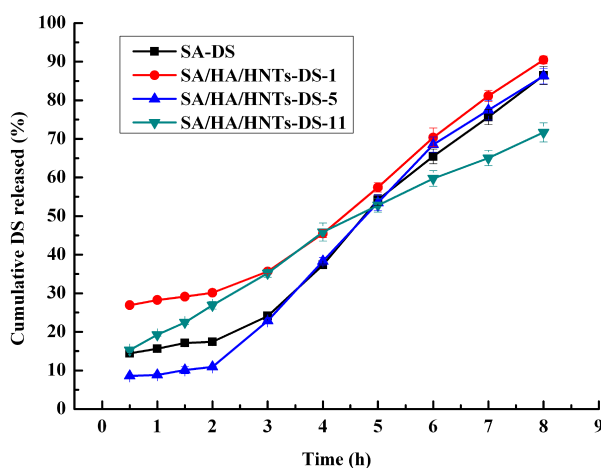

**Fig. S2** Cumulative release profiles of SA-DS and SA/HA/HNTs-DS nanocomposite beads in pH 5.0 PBS.

**Table S1.** Chemical composition of HNTs obtained from XRF.

|                                | Content / % |
|--------------------------------|-------------|
| Al <sub>2</sub> O <sub>3</sub> | 40.4        |
| SiO <sub>2</sub>               | 54.6        |
| SO <sub>3</sub>                | 1.8         |
| K <sub>2</sub> O               | 0.654       |
| CaO                            | 0.27        |
| TiO <sub>2</sub>               | 0.29        |
| Fe <sub>2</sub> O <sub>3</sub> | 1.50        |

**Table S2.** Solubility of DS in pH 2.1, 5.0 and 7.4 PBS at 37±0.5°C.

| pH of PBS                   | 2.1 | 5.0  | 7.4  |
|-----------------------------|-----|------|------|
| Solubility / % <sup>a</sup> | 0   | 0.09 | 2.03 |

<sup>a</sup> Solubility / % = the DS content /the solvent content × 100%
